# Supplementary material
Source: PubMed Central journal article supplement (PMC4056728)
Supplement: ml1000905_si_001.pdf [file ml1000905_si_001.pdf]

## Supplementary Material

for

### The Nitric Oxide Prodrug V-PROLI/NO Inhibits Cellular Uptake of Proline

Sam Y. Hong,<sup>†</sup> Gregory L. Borchert,<sup>‡</sup> Anna E. Maciag,<sup>‡</sup> Rahul S. Nandurdikar,<sup>†</sup> Joseph E. Saavedra,<sup>‡</sup> James M. Phang,<sup>\*,§</sup> Larry K. Keefer,<sup>†</sup> and Harinath Chakrapani<sup>\*,£</sup>

<sup>†</sup>Chemistry Section, Laboratory of Comparative Carcinogenesis, National Cancer Institute at Frederick, Frederick, Maryland 21702. <sup>‡</sup>Basic Sciences Program, SAIC-Frederick, National Cancer Institute at Frederick, Frederick, Maryland 21702. <sup>§</sup>Metabolism and Cancer Susceptibility Section, National Cancer Institute at Frederick, Frederick, Maryland 21702. <sup>£</sup>Department of Chemistry, Indian Institute of Science Education and Research, Pune 411 008, Maharashtra, India.

\*Corresponding author. e-mail: [phangj@mail.nih.gov](mailto:phangj@mail.nih.gov) [harinath@iiserpune.ac.in](mailto:harinath@iiserpune.ac.in)

#### General.

DAF-FM DA was obtained from Invitrogen. Acetonitrile (MeCN), dimethyl sulfoxide (DMSO), and sodium nitrite were purchased from Sigma-Aldrich Company. L-[<sup>14</sup>C] Proline obtained in ethanol:water solution from PerkinElmer. HBSS, Dulbecco's Modified Eagle Medium (DMEM), and Eagle's Minimum Essential Medium (EMEM) were obtained from Gibco. Radio-Immunoprecipitation Assay (RIPA) Buffer was obtained from Thermo Scientific. Scintillation cocktail used was Ecoscint A from National Diagnostics. Hepatocellular carcinoma HepG2 cells and human colorectal adenocarcinoma CaCo-2 cell lines used in this study were obtained from American Type Culture Collection. HepG2 cells were maintained in DMEM supplemented with 10 % fetal calf serum, 100 U/mL penicillin and 2 mM glutamine, at 37 °C and 5 % CO<sub>2</sub>. CaCo-2 cells were maintained in EMEM supplemented with 10 % fetal calf serum, 100 U/mL penicillin and 2 mM glutamine, at 37 °C and 5 % CO<sub>2</sub>. An Agilent 1100 series HPLC fitted with a C-18 reverse phase column (Phenomenex Luna 250 × 4.60 mm) operating at 262 nm and run isocratically with MeCN:water (75%, v/v) was used to analyze the decomposition profile. Quantification of NO by chemiluminescence was determined by using a Sievers nitric oxide analyzer (NOA) model 280i. Fluorescence spectrometry was performed on a PerkinElmer LS50B luminescence spectrometer. Radiolabeled proline uptake was measured using a Beckman LS 6000TA liquid scintillation counter. V-PYRRO/NO (**1a**), V-PROLI/NO (**1b**), **1c**, **1d**, V-SARCO/NO (**1e**), **1f** were synthesized through reported methods.<sup>1,2</sup>

**Table S1. Fluorescence values for CaCo-2 DAF-FM assay**

| Compound (Concentration) | Fluorescence (AU) |       | Average Fluorescence (AU) |
|--------------------------|-------------------|-------|---------------------------|
| DMSO                     | 0.534             | 0.515 | 0.525                     |
| <b>1a</b> (100 $\mu$ M)  | 0.531             | 0.595 | 0.563                     |
| <b>1a</b> (250 $\mu$ M)  | 0.696             | 0.705 | 0.701                     |
| <b>1b</b> (50 $\mu$ M)   | 2.168             | 2.618 | 2.393                     |
| <b>1b</b> (100 $\mu$ M)  | 4.24              | 4.113 | 4.177                     |
| <b>1b</b> (250 $\mu$ M)  | 9.433             | 8.201 | 8.817                     |
| <b>1c</b> (100 $\mu$ M)  | 0.761             | 0.852 | 0.807                     |
| <b>1d</b> (100 $\mu$ M)  | 0.666             | 0.774 | 0.720                     |
| <b>1e</b> (50 $\mu$ M)   | 3.819             | 3.79  | 3.805                     |
| <b>1e</b> (100 $\mu$ M)  | 6.637             | 6.283 | 6.46                      |
| <b>1e</b> (250 $\mu$ M)  | 13.62             | 16.4  | 15.01                     |
| <b>1f</b> (100 $\mu$ M)  | 0.644             | 0.739 | 0.692                     |

**Table S2. Fluorescence values for HepG2 DAF-FM assay**

| Compound (Concentration) | Fluorescence (AU) |        | Average Fluorescence (AU) |
|--------------------------|-------------------|--------|---------------------------|
| DMSO                     | 0.394             | 0.498  | 0.446                     |
| <b>1a</b> (100 $\mu$ M)  | 0.480             | 0.547  | 0.514                     |
| <b>1a</b> (250 $\mu$ M)  | 0.563             | 0.539  | 0.551                     |
| <b>1b</b> (50 $\mu$ M)   | 2.704             | 2.799  | 2.752                     |
| <b>1b</b> (100 $\mu$ M)  | 3.638             | 3.376  | 3.507                     |
| <b>1b</b> (250 $\mu$ M)  | 4.738             | 5.118  | 4.928                     |
| <b>1c</b> (100 $\mu$ M)  | 0.622             | 0.556  | 0.589                     |
| <b>1d</b> (100 $\mu$ M)  | 0.554             | 0.579  | 0.567                     |
| <b>1e</b> (50 $\mu$ M)   | 6.915             | 6.904  | 6.910                     |
| <b>1e</b> (100 $\mu$ M)  | 10.770            | 11.390 | 11.080                    |
| <b>1e</b> (250 $\mu$ M)  | 19.620            | 21.250 | 20.435                    |
| <b>1f</b> (100 $\mu$ M)  | 0.602             | 0.630  | 0.616                     |

**Table S3. Area of HPLC traces (mAU·s)**

| Time (d) | V-PYRRO/NO<br>(mAU·s) |      | V-PROLI/NO<br>(mAU·s) |     | V-SARCO/NO<br>(mAU·s) |     |
|----------|-----------------------|------|-----------------------|-----|-----------------------|-----|
| 0        | 1044                  | 1090 | 978                   | 916 | 820                   | 855 |
| 0.25     | 1056                  | 1099 | 825                   | 865 | 808                   | 855 |
| 1        | 1037                  | 1084 | 810                   | 848 | 778                   | 739 |
| 4        | 925                   | 1004 | 797                   | 835 | 712                   | 676 |
| 5        | 902                   | 990  | 727                   | 767 | 652                   | 602 |
| 6        | 845                   | 947  | 733                   | 770 | 639                   | 602 |
| 7        | 803                   | 915  | 712                   | 747 | 633                   | 593 |

**Table S4. Standard curve for nitrite determination**

| Nitrite ( $\mu\text{M}$ ) | Volume ( $\mu\text{L}$ ) | pmol | Area (mAU·s) |          |
|---------------------------|--------------------------|------|--------------|----------|
| 200.0                     |                          | 10   | 2000         | 4.04E+06 |
| 150.0                     |                          | 15   | 2250         | 2.84E+06 |
| 100.0                     |                          | 10   | 1000         | 1.93E+06 |
| 75.0                      |                          | 15   | 1125         | 1.23E+06 |
| 50.0                      |                          | 10   | 500          | 9.27E+05 |
| 25.0                      |                          | 10   | 250          | 4.50E+05 |
| 12.5                      |                          | 10   | 125          | 2.07E+05 |
| 6.3                       |                          | 10   | 62.5         | 1.03E+05 |
| 3.1                       |                          | 10   | 31           | 4.63E+04 |

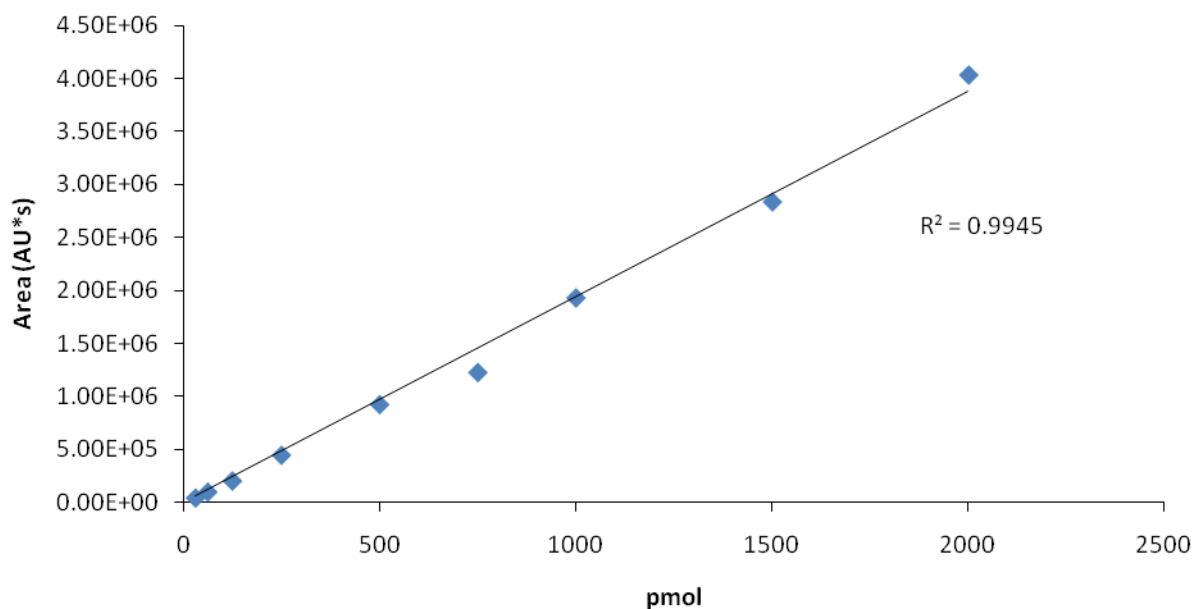**Figure S1. Standard curve for nitrite determination**

**Table S5. Nitrite Levels found using 50 uL injections of cell culture medium**

| Compound    | Area (mAU·s) | Nitrite (pmol) | Injection Volume (μL) | Concentration (μM) |
|-------------|--------------|----------------|-----------------------|--------------------|
| V-SARCO/NO  | 2.04E+06     | 1053.771       | 50                    | 21.08              |
| V-SARCO/NO  | 2.16E+06     | 1113.574       | 50                    | 22.27              |
| V-PROLI/NO  | 3.35E+05     | 172.7071       | 50                    | 3.45               |
| V-PROLI/NO  | 3.69E+05     | 190.2356       | 50                    | 3.80               |
| V-PYRRRO/NO | 0.00E+00     | 0              | 50                    | 0.00               |
| V-PYRRO/NO  | 0.00E+00     | 0              | 50                    | 0.00               |

**Table S6. Radiolabeled proline uptake data.**

| Compound                             | CPM |     |     | Average CPM | Average DPM | σ  |
|--------------------------------------|-----|-----|-----|-------------|-------------|----|
|                                      |     |     |     |             |             |    |
| <sup>14</sup> C-Proline Only         | 919 | 963 | 924 | 935         | 843         | 24 |
| <sup>14</sup> C-Proline + Proline    | 242 | 303 | 336 | 294         | 202         | 48 |
| <sup>14</sup> C-Proline + V-PYRRO/NO | 604 | 575 | 652 | 610         | 518         | 39 |
| <sup>14</sup> C-Proline + V-PROLI/NO | 231 | 202 | 226 | 220         | 128         | 16 |
| <sup>14</sup> C-Proline + V-SARCO/NO | 434 | 422 | 455 | 437         | 345         | 17 |

**References**

1. Hong, S. Y.; Saavedra, J. E.; Keefer, L. K.; Chakrapani, H. Improved synthesis of V-PYRRO/NO, a liver-selective nitric oxide prodrug, and analogues. *Tetrahedron Lett.* **2009**, *50*, 2069-2071.
2. Hong, S. Y.; Nandurdikar, R. S.; Keefer, L. K.; Saavedra, J. E.; Chakrapani, H. An improved synthesis of V-PROLI/NO, a cytochrome P450-activated nitric oxide prodrug. *Tetrahedron Lett.* **2009**, *50*, 4545-4548.
